# Supplementary material for: One-step synthesis of silver nanoplates with high aspect ratios: using coordination of silver ions to enhance lateral growth
Source: Royal Society of Chemistry journal article supplement (doi:10.1039/c6ra22849f), 2016-01-01
Supplement: c6ra22849f1.pdf [file c6ra22849f1.pdf]

# One-Step Synthesis of Silver Nanoplates with a High Aspect Ratio: Enhancing Lateral Growth by Coordination

Young Min Park,<sup>a,†</sup> Byung Gon Lee,<sup>a,†</sup> Jong-Il Weon,<sup>b</sup> and Mun Ho Kim<sup>a,\*</sup>

<sup>a</sup>Department of Polymer Engineering, Pukyong National Univeristy, 365 Sinseon-ro, Nam-gu, Busan 48547, Republic of Korea.

<sup>b</sup>Department of Safety Engineering, Dongguk University, 707 Seokjang-dong, Gyeongju, Gyeongbuk 780-714, Republic of Korea

Email: [munho@pknu.ac.kr](mailto:munho@pknu.ac.kr)

<sup>†</sup>These two authors contributed equally to this work.

**Supporting Figures**

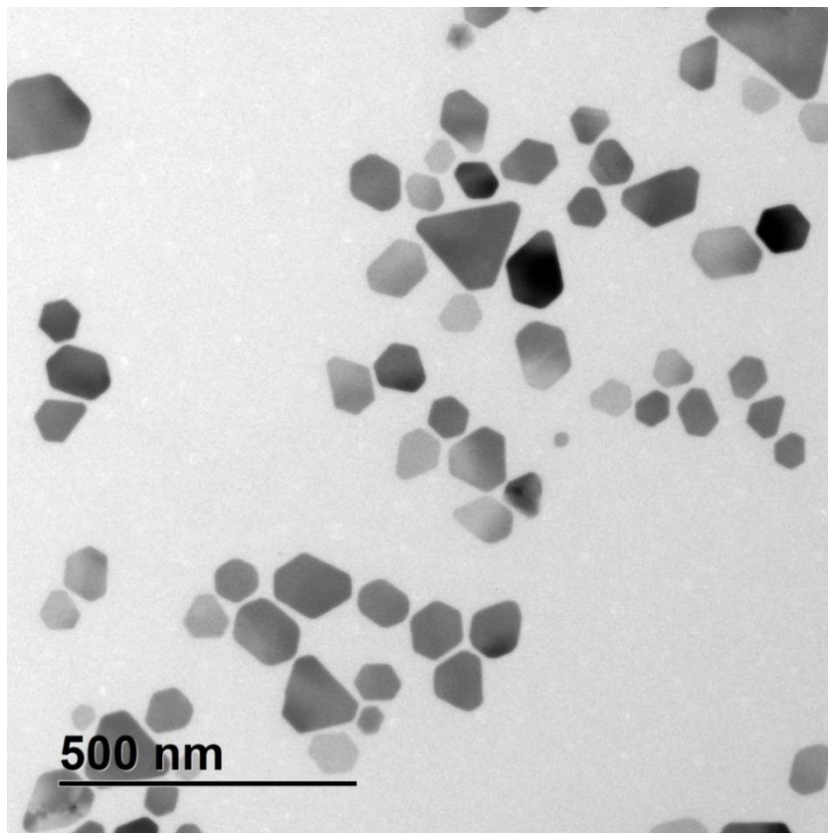

**Fig. S1.** TEM image of Ag nanoplates formed in pure acetonitrile. The w/w ratio of PVP (29 kDa) to AgNO<sub>3</sub> was 19.5. All syntheses were performed at 100 °C over a period of 24 h.

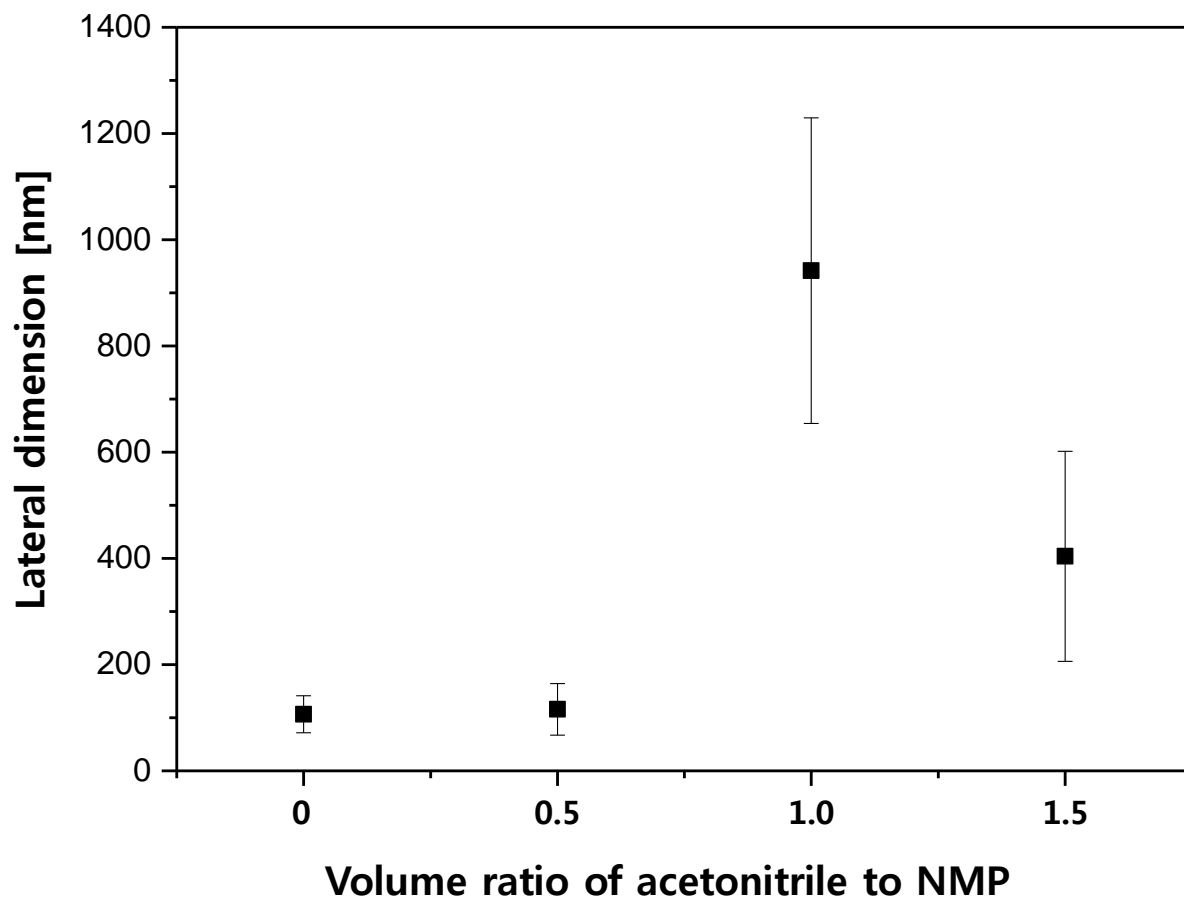

**Fig. S2.** Plot of the lateral dimension of the Ag nanoplates as a function of the volume ratio of acetonitrile.

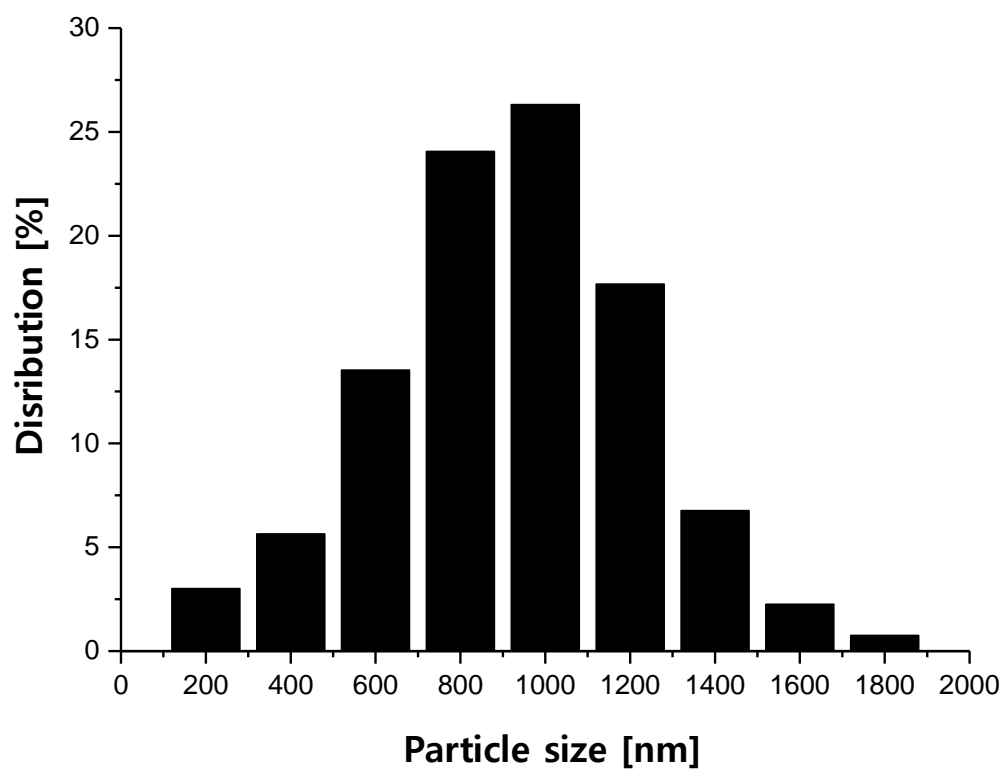

**Fig. S3.** Size distribution of Ag nanoplates formed in the presence of acetonitrile (sample shown in Figure 1B).

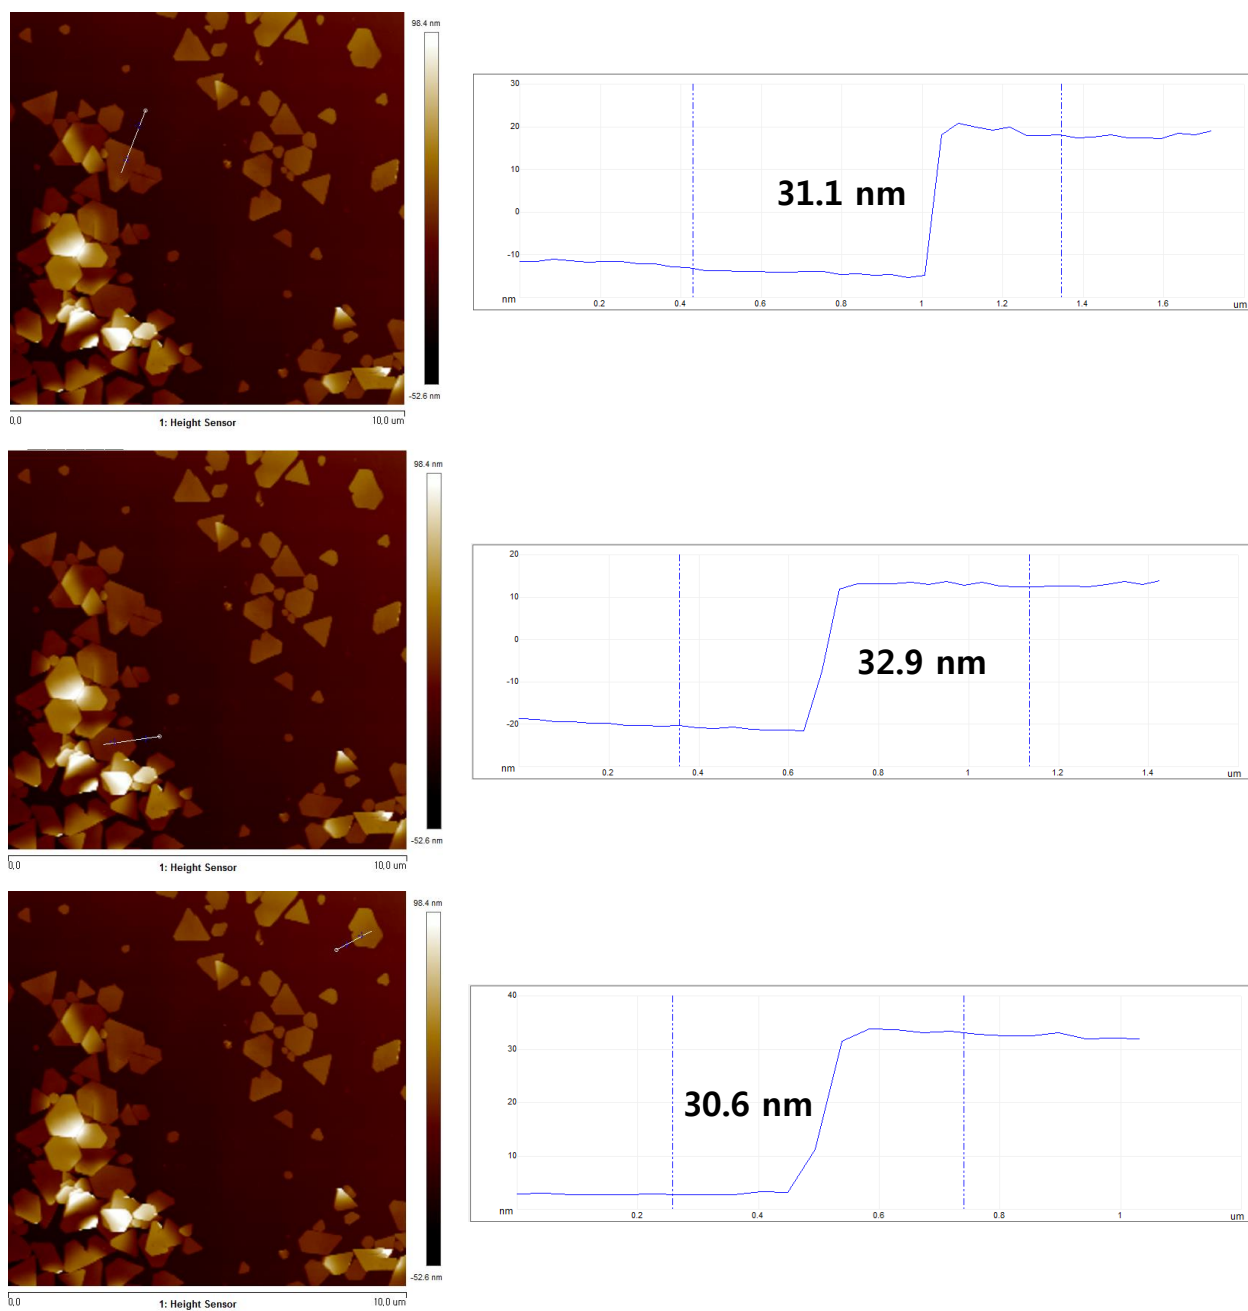

**Fig. S4.** AFM images and corresponding height profiles of the Ag nanoplates shown in Figure 1C. The thickness values of these Ag nanoplates were measured to be approximately 30 nm.

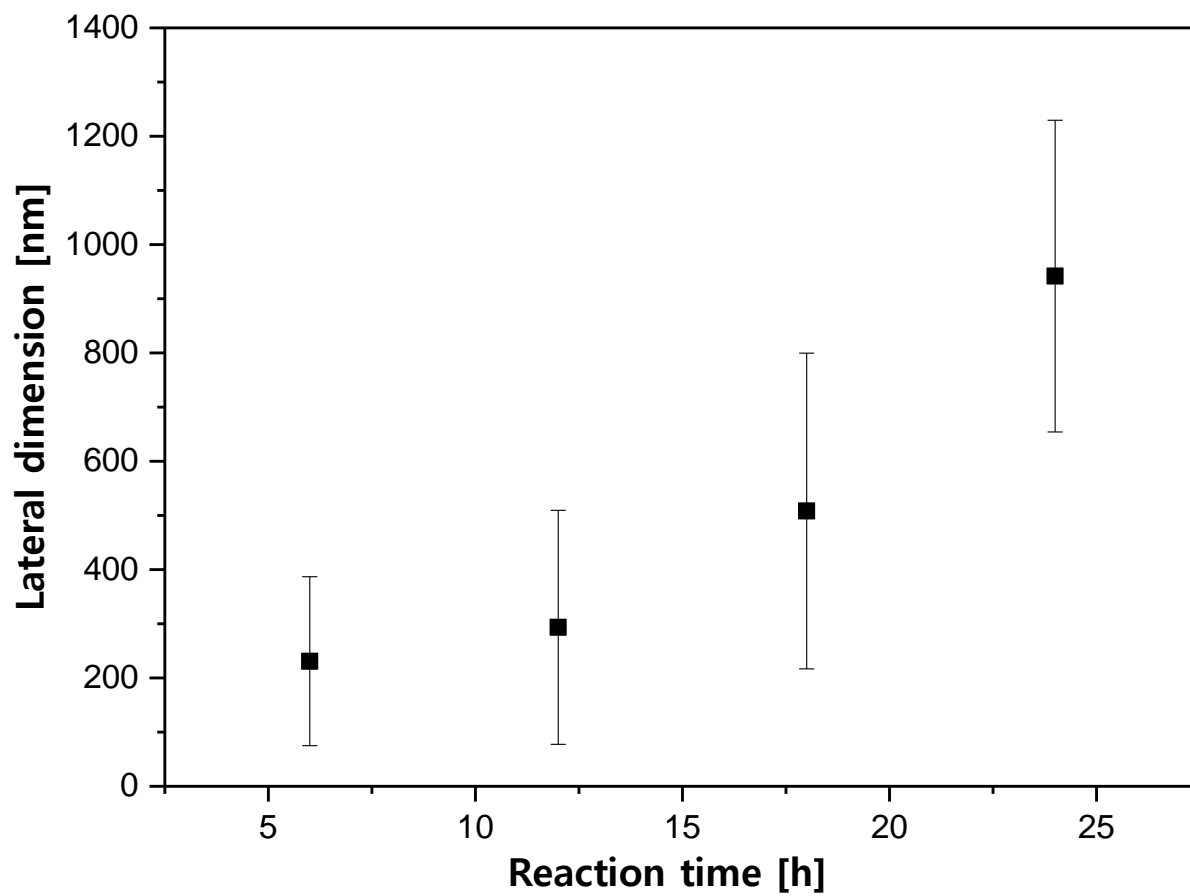

**Fig. S5.** Plot of the lateral dimension of Ag nanoplates as a function of reaction time.

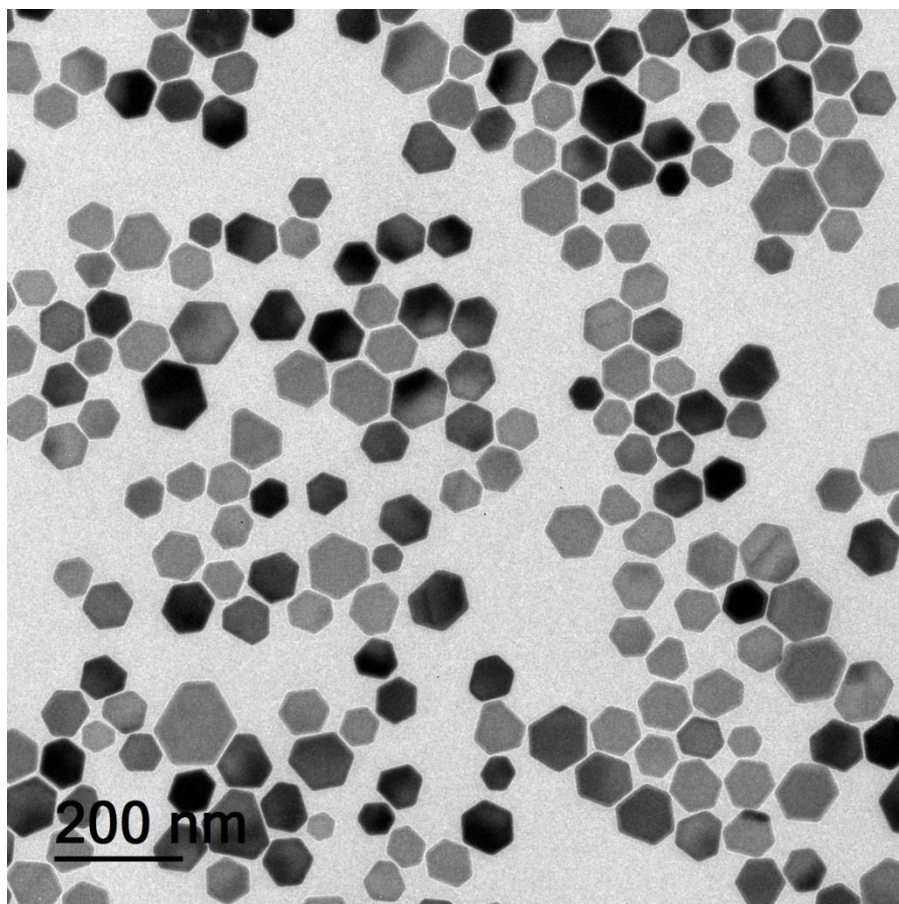

**Fig. S6.** TEM image of Ag nanoplates formed in pure NMP. The w/w ratio PVP (29 kDa) to AgNO<sub>3</sub> was 9.75. All syntheses were performed at 100 °C over a period of 24 h.

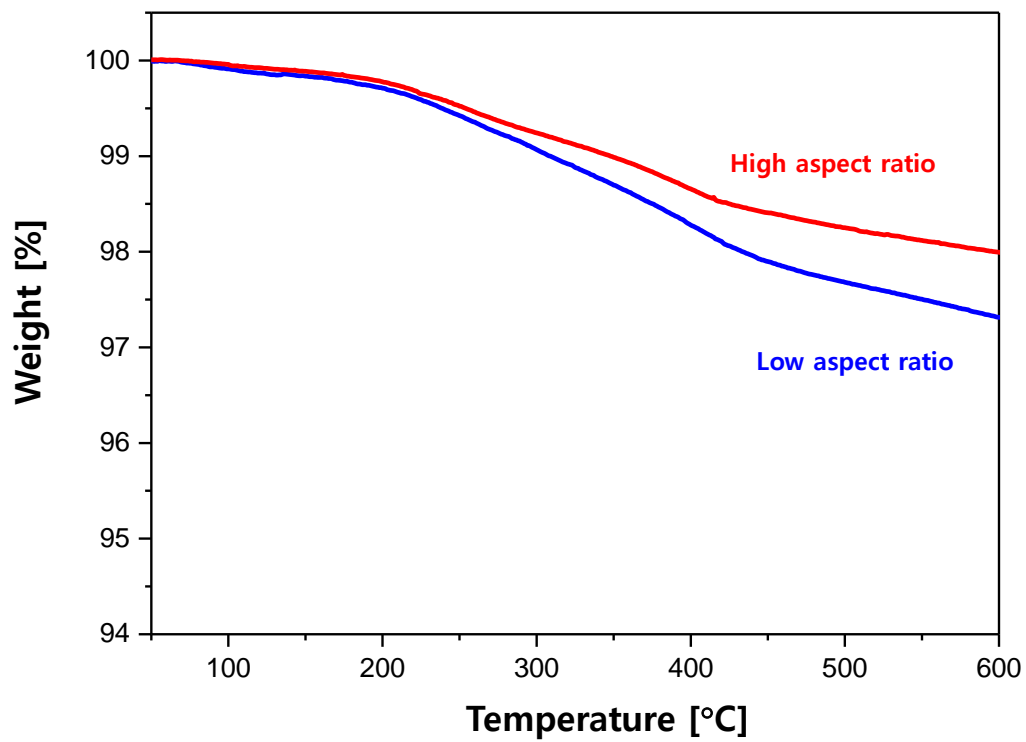

**Fig. S7.** TGA curves of the conductive patterns formed by the Ag nanoplates used in the electrical conductivity measurements.
